# Supplementary material
Source: PubMed Central journal article supplement (PMC7483307)
Supplement: NIHMS1593551-supplement-1593551_SourceData_Fig3e.pdf [file NIHMS1593551-supplement-1593551_SourceData_Fig3e.pdf]

# Source Data for Fig. 3e

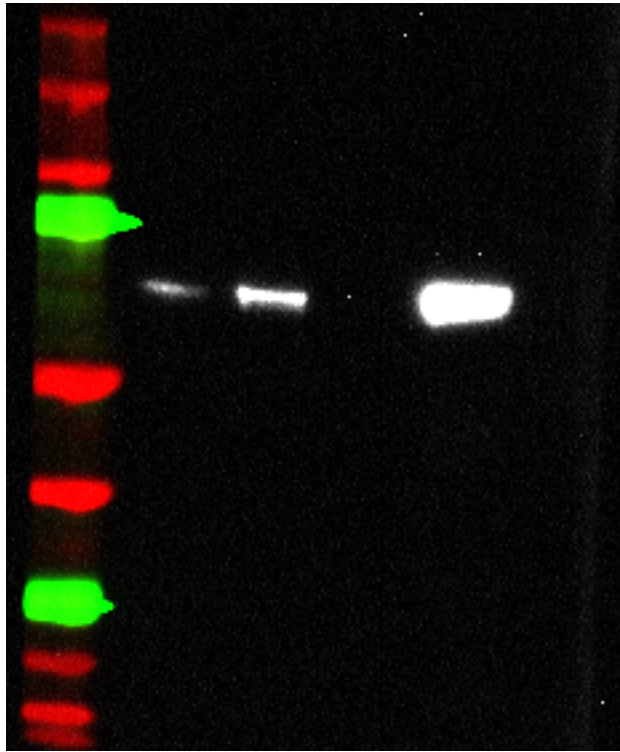

Fig. 3e, RBBP5-IP anti-RBBP5

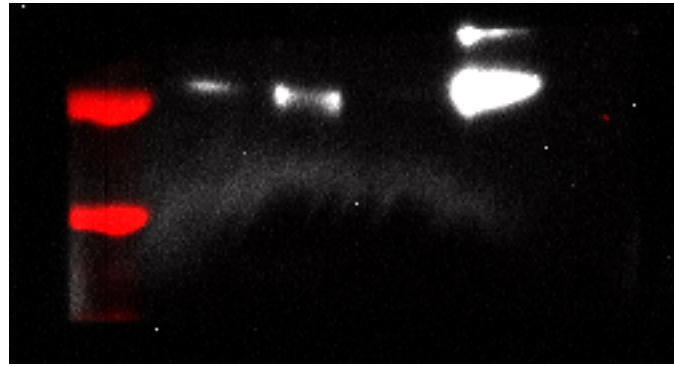

Fig. 3e, RBBP5-IP anti-WTAP

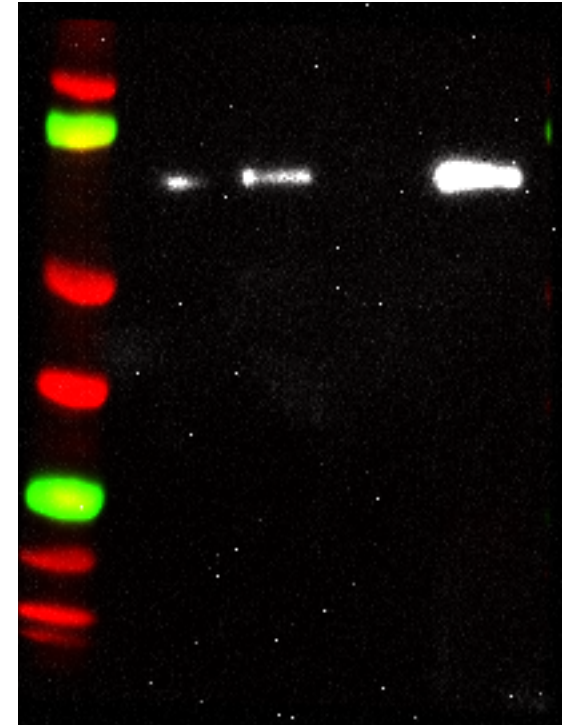

Fig. 3e, RBBP5-IP anti-METTL3

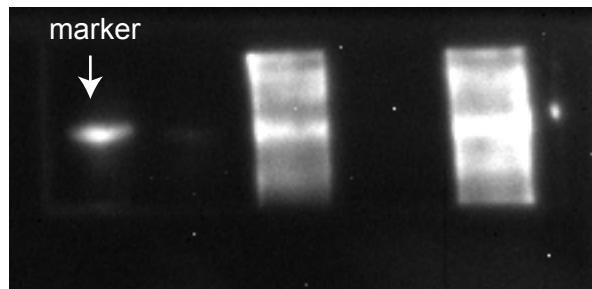

Fig. 3e, RBBP5-IP anti-VIRMA

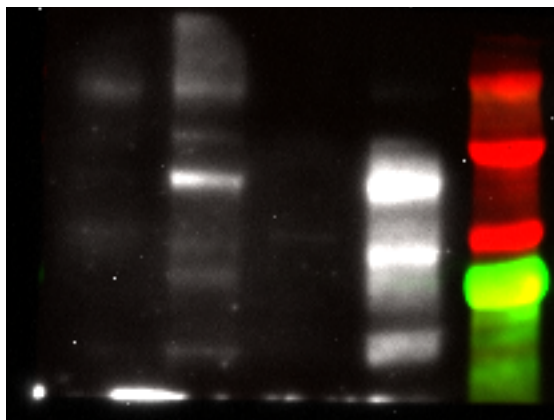

Fig. 3e, BACH1-IP anti-BACH1

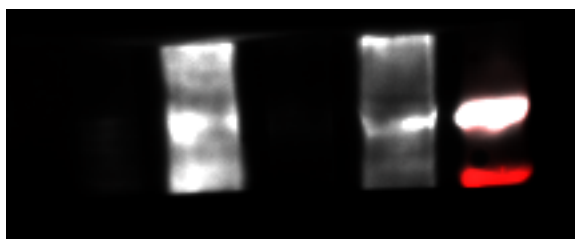

Fig. 3e, BACH1-IP anti-VIRMA

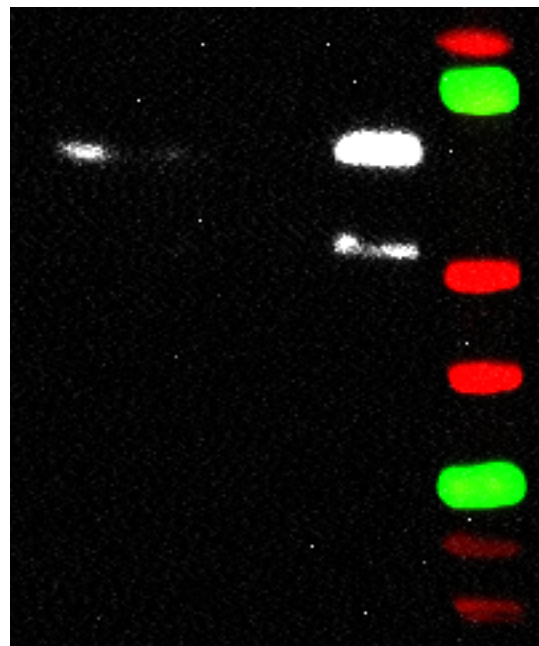

Fig. 3e, BACH1-IP anti-METTL3

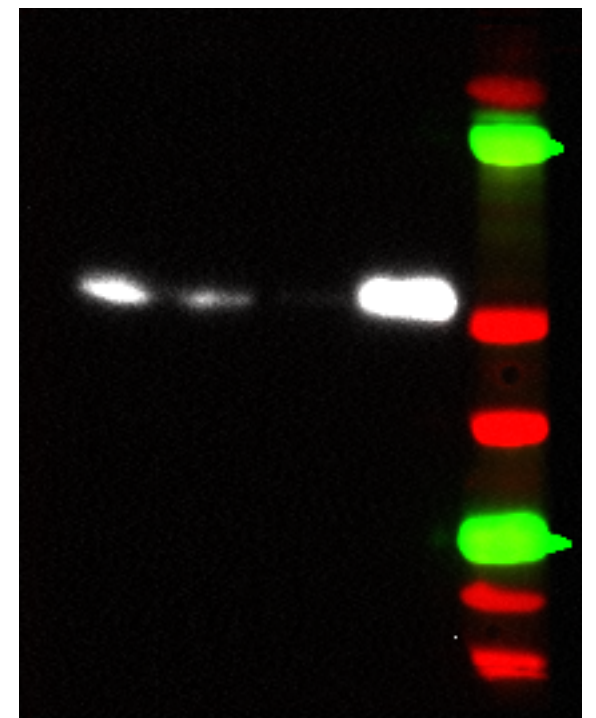

Fig. 3e, BACH1-IP anti-WTAP
